# Supplementary material
Source: MDPI journal article supplement (https://www.mdpi.com/2077-0472/14/5/727)
Supplement: s1 [file s1]

# The Effect of Renewable Phosphorus Biofertilizers on Selected Wheat Grain Quality Parameters

Magdalena Jastrzębska, Marta K. Kostrzevska and Agnieszka Saeid

## Supplementary Information

**Table S1.** Elemental composition of P-fertilizers used in the field experiments.

| Element | Unit                | Biofertilizers <sup>1</sup> |             |             |              |              |                        |                        | Referential nutrient carriers |                 |                                 |                         |                                   |                                   |
|---------|---------------------|-----------------------------|-------------|-------------|--------------|--------------|------------------------|------------------------|-------------------------------|-----------------|---------------------------------|-------------------------|-----------------------------------|-----------------------------------|
|         |                     | <i>AsBm</i>                 | <i>BsBm</i> | <i>AgAf</i> | <i>ABgAf</i> | <i>ABgBm</i> | <i>AHgBm</i><br>(2016) | <i>AHgBm</i><br>(2017) | SP <sup>2</sup>               | PR <sup>3</sup> | A+H <sub>2</sub> O <sup>1</sup> | <i>ABg</i> <sup>1</sup> | <i>AHg</i> <sup>1</sup><br>(2016) | <i>AHg</i> <sup>1</sup><br>(2017) |
| P       | % mass.             | 0.176                       | 0.259       | 9.24        | 7.50         | 5.87         | 9.55                   | 4.95                   | 17.6                          | 12.9            | 0.176                           | 6.10                    | 8.68                              | 5.40                              |
| N       |                     | 0.255                       | 0.350       | 0.530       | 3.190        | 3.14         | 2.87                   | 3.15                   |                               |                 | 0.255                           | 3.82                    | 2.89                              | 3.44                              |
| K       |                     | 0.487                       | 0.217       | 0.963       | 0.727        | 0.772        | 1.16                   | 0.67                   |                               |                 | 0.487                           | 0.846                   | 1.09                              | 0.62                              |
| Ca      |                     | 0.694                       | 0.373       | 12.5        | 12.0         | 10.7         | 14.6                   | 12.3                   | 7.14                          | 35.3            | 0.694                           | 11.4                    | 13.4                              | 14.2                              |
| Mg      |                     | 0.119                       | 0.009       | 2.442       | 1.176        | 1.188        | 1.70                   | 0.78                   |                               | 0.295           | 0.119                           | 1.296                   | 1.54                              | 0.79                              |
| S       |                     | 0.055                       | 0.046       | 1.38        | 1.50         | 1.91         | 0.56                   | 0.40                   | 2.0                           |                 | 0.055                           | 2.28                    | 0.56                              | 0.47                              |
| Na      |                     | 0.049                       | 0.037       | 0.338       | 0.569        | 0.366        | 0.595                  | 0.595                  |                               |                 | 0.049                           | 0.382                   | 0.368                             | 0.368                             |
| C       |                     | 0.590                       | 1.650       | 6.71        | 23.6         | 16.1         | 13.9                   | 18.1                   |                               |                 | 0.590                           | 17.6                    | 12.5                              | 16.5                              |
| Fe      | g kg <sup>-1</sup>  | 1.679                       | 0.022       | 33.0        | 15.1         | 14.4         | 29.0                   | 11.3                   | +                             | 1.61            | 1.68                            | 15.4                    | 26.9                              | 11.4                              |
| Al      |                     | 1.774                       | 0.008       | 24.4        | 13.9         | 11.3         | 25.5                   | 12.1                   |                               | 1.69            | 1.77                            | 12.8                    | 23.7                              | 11.3                              |
| Zn      |                     | 0.117                       | 0.007       | 2.00        | 1.18         | 1.56         | 3.29                   | 0.99                   | +                             |                 | 0.12                            | 1.75                    | 3.14                              | 1.09                              |
| As      | mg kg <sup>-1</sup> | < 0.5                       | < 0.5       | 4.35        | 2.55         | < 0.5        | 20.0                   | 20.5                   |                               | 0.750           | < 0.5                           | 26.5                    | 31.4                              | 15.5                              |
| Cd      |                     | 0.274                       | 0.01        | 0.43        | 0.24         | 0.84         | 0.345                  | 0.742                  |                               | 7.80            | 0.27                            | 0.38                    | <0.01                             | 0.66                              |
| Cr      |                     | 5.94                        | 0.218       | 135         | 60.0         | 94.7         | 62.9                   | 59.1                   |                               |                 | 5.94                            | 114                     | 54.7                              | 63.9                              |
| Cu      |                     | 55.0                        | 0.433       | 880         | 398          | 444          | 850                    | 334                    | +                             |                 | 55.0                            | 470                     | 778                               | 334                               |
| Ni      |                     | 2.45                        | 0.212       | 57.7        | 25.1         | 44.3         | 62.6                   | 21.2                   |                               |                 | 2.45                            | 52.3                    | 54.8                              | 28.5                              |
| Pb      |                     | 10.4                        | 1.04        | 21.6        | 11.2         | 14.5         | 21.8                   | 4.53                   |                               | 6.21            | 10.4                            | 34.0                    | 19.9                              | 0.92                              |
| B       |                     | nd                          | nd          | nd          | nd           | 35,2         | 74.1                   | 57.6                   | +                             |                 | nd                              | 40,5                    | 71.3                              | 41.1                              |
| Ba      |                     | nd                          | nd          | nd          | nd           | 234          | 382                    | 168                    |                               |                 | nd                              | 245                     | 349                               | 162                               |
| Co      |                     | nd                          | nd          | nd          | nd           | 5,46         | 16.2                   | 4.24                   | +                             |                 | nd                              | 5.97                    | 14.0                              | 5.24                              |
| Mn      |                     | nd                          | nd          | nd          | nd           | 346          | 609                    | 437                    | +                             |                 | nd                              | 370                     | 562                               | 299                               |
| Mo      |                     | nd                          | nd          | nd          | nd           | 10,4         | 23.7                   | 13.9                   | +                             |                 | nd                              | 13.3                    | 35.3                              | 2.25                              |

<sup>1</sup> according to the Department of Advanced Material Technologies of the Wrocław University of Science and Technology, Wrocław, Poland;

<sup>2</sup> according to label information; <sup>3</sup> according to the New Chemical Syntheses Institute in Puławy, Poland; nd - no data; + - trace presence

**Table S2.** Field experiments conducted – experiment details and basic agricultural data.

| Item                                      | Experiment                               |                                          |                                          |                                          |                                                            |                                                            |                                          |
|-------------------------------------------|------------------------------------------|------------------------------------------|------------------------------------------|------------------------------------------|------------------------------------------------------------|------------------------------------------------------------|------------------------------------------|
|                                           | I                                        | II                                       | III                                      | IV                                       | V                                                          | VI                                                         | VII                                      |
| Growing season                            | 2014                                     | 2015                                     | 2015                                     | 2016                                     | 2016                                                       | 2017                                                       | 2017                                     |
| Test crop (cultivar)                      | spring wheat<br>(Trappe)                 | spring wheat<br>(Monsun)                 | winter wheat<br>(Julius)                 | winter wheat<br>(Julius)                 | spring wheat<br>(Monsun)                                   | winter wheat<br>(Julius)                                   | spring wheat<br>(Monsun)                 |
| Biofertilizers tested                     | <i>A<sub>s</sub>B<sub>m</sub></i>        | <i>A<sub>s</sub>B<sub>m</sub></i>        | <i>A<sub>g</sub>A<sub>f</sub></i>        | <i>AB<sub>g</sub>B<sub>m</sub></i>       | <i>AH<sub>g</sub>B<sub>m</sub></i>                         | <i>AH<sub>g</sub>B<sub>m</sub></i>                         | <i>AH<sub>g</sub>B<sub>m</sub></i>       |
|                                           | <i>B<sub>s</sub>B<sub>m</sub></i>        |                                          | <i>AB<sub>g</sub>A<sub>f</sub></i>       |                                          |                                                            |                                                            |                                          |
| Reference treatments                      | no P                                                       | no P                                                       | no P                                     |
|                                           | SP                                       | SP                                       | SP                                       | SP                                       | SP                                                         | SP                                                         | SP                                       |
|                                           | PR                                       | PR                                       |                                          | AB <sub>g</sub>                          | AH <sub>g</sub>                                            | AH <sub>g</sub>                                            | AH <sub>g</sub>                          |
|                                           | A + H <sub>2</sub> O                     |                                          |                                          |                                          |                                                            |                                                            |                                          |
| P <sup>1</sup> doses, kg ha <sup>-1</sup> | 21                                       | 17.6                                     | 17.6                                     | 17.6                                     | 17.6                                                       | 17.6                                                       | 17.6                                     |
|                                           |                                          | 26.4                                     | 26.4                                     | 26.4                                     | 26.4                                                       | 26.4                                                       | 26.4                                     |
|                                           |                                          | 35.2                                     | 35.2                                     | 35.2                                     | 35.2                                                       | 35.2                                                       | 35.2                                     |
| K <sup>1</sup> , kg ha <sup>-1</sup>      | 99.6                                     | 83                                       | 83                                       | 83                                       | 83                                                         | 83                                                         | 83                                       |
| N, kg ha <sup>-1</sup>                    | 100 (50 <sup>1</sup> + 50 <sup>3</sup> ) | 110 (60 <sup>1</sup> + 50 <sup>3</sup> ) | 130 (80 <sup>2</sup> + 50 <sup>3</sup> ) | 120 (70 <sup>2</sup> + 50 <sup>3</sup> ) | 130 (60 <sup>1</sup> + 50 <sup>3</sup> + 20 <sup>4</sup> ) | 150 (80 <sup>2</sup> + 50 <sup>3</sup> + 20 <sup>4</sup> ) | 110 (60 <sup>1</sup> + 50 <sup>3</sup> ) |
| Plant protection (PP)                     | PP–                                      | PP– PP+                                  | PP+                                      | PP+                                      | PP+                                                        | PP+                                                        | PP+                                      |
| – herbicides                              | –                                        | –/+                                      | +                                        | +                                        | +                                                          | +                                                          | +                                        |
| – fungicides                              | –                                        | –/+                                      | +                                        | +                                        | +                                                          | +                                                          | +                                        |
| – insecticides                            | –                                        | –/+                                      | +                                        | +                                        | +                                                          | +                                                          | +                                        |
| – growth regulators                       | –                                        | –                                        | +                                        | +                                        | –                                                          | +                                                          | –                                        |
| Previous crop                             | spring barley                            | cereal-legume<br>mixture                 | winter rape                              | winter rape                              | winter rape                                                | winter wheat                                               | spring wheat                             |
| Soil tillage system                       | plough tillage                                             | plough tillage                                             | plough tillage                           |
| Sowing date                               | 25 April 2014                            | 9 April 2015                             | 2 October 2014                           | 15 October 2015                          | 21 April 2016                                              | 4 October 2016                                             | 20 April 2017                            |
| Harvest date                              | 11 August 2014                           | 11 August 2015                           | 5 August 2015                            | 9 August 2016                            | 12 August 2016                                             | 4 August 2017                                              | 18 August 2017                           |
| Number of treatment combinations          | 6                                        | 20 <sup>5</sup>                          | 10                                       | 10                                       | 10                                                         | 10                                                         | 10                                       |
| Experimental design                       | randomized block                         | parallel strip                           | randomized block                         | randomized block                         | randomized block                                           | randomized block                                           | randomized block                         |
| Number of replications                    | 4                                        | 4                                        | 4                                        | 4                                        | 4                                                          | 4                                                          | 4                                        |
| Number of plots                           | 24                                       | 80                                       | 40                                       | 40                                       | 40                                                         | 40                                                         | 40                                       |
| Plot area, m <sup>2</sup>                 | 20                                       | 20                                       | 20                                       | 20                                       | 20                                                         | 20                                                         | 20                                       |

<sup>1</sup> pre-sowing, <sup>2</sup> at post-winter vegetation start, <sup>3</sup> at wheat stem elongation, <sup>4</sup> at wheat heading; PP– - no plant protection treatments; PP+ - full plant protection; <sup>5</sup> in Experiment II, the level of plant protection was an additional experimental factor; + - applied, – - not applied.

**Table S3.** Soil characteristics before the start of the experiments.

| Experiment | Soil Type | Soil Texture    | pH <sub>KCl</sub> | Total, g kg <sup>-1</sup> |      |      |      |      |      |
|------------|-----------|-----------------|-------------------|---------------------------|------|------|------|------|------|
|            |           |                 |                   | C                         | N    | P    | K    | Mg   | P    |
| I          | Luvisols  | sandy clay loam | 6.23              | 8.31                      | 1.30 | 0.57 | 2.98 | 2.07 | 0.57 |
| II         | Luvisols  | sandy loam      | 5.32              | 8.90                      | 1.35 | 0.57 | 2.90 | 2.01 | 0.57 |
| III        | Luvisols  | sandy loam      | 5.51              | 8.87                      | 1.36 | 0.43 | 3.21 | 2.25 | 0.43 |
| IV         | Luvisols  | sandy loam      | 5.23              | 7.15                      | 1.09 | 0.55 | 3.30 | 2.20 | 0.55 |
| V          | Luvisols  | sandy clay loam | 6.28              | 8.53                      | 1.42 | 0.61 | 2.98 | 2.02 | 0.61 |
| VI         | Luvisols  | sandy loam      | 4.98              | 6.48                      | 1.01 | 0.49 | 2.95 | 1.88 | 0.49 |
| VII        | Luvisols  | sandy clay loam | 6.23              | 8.48                      | 1.34 | 0.60 | 3.14 | 1.94 | 0.60 |

**Table S4.** Precipitation and air temperature during the study period according to the Meteorological Station in Bałcyny, Poland.

| Year                | Month |      |      |      |      |       |       |      |      |      |      |      |
|---------------------|-------|------|------|------|------|-------|-------|------|------|------|------|------|
|                     | I     | II   | III  | IV   | V    | VI    | VII   | VIII | IX   | X    | XI   | XII  |
| Precipitation, mm   |       |      |      |      |      |       |       |      |      |      |      |      |
| 2014                |       |      |      | 26.1 | 34.9 | 72.2  | 20.4  | 59.2 | 30.8 | 21.3 | 21.2 | 56.6 |
| 2015                | 28.5  | 8.8  | 46.0 | 23.4 | 25.4 | 43.0  | 71.0  | 13.0 | 51.2 | 20.8 | 80.8 | 80.4 |
| 2016                | 28.7  | 50.5 | 20.5 | 33.1 | 70.8 | 66.3  | 138.6 | 71.9 | 17.1 | 96.3 | 78.2 | 77.8 |
| 2017                | 15.8  | 40.5 | 53.0 | 52.1 | 34.0 | 109.9 | 106.1 | 54.8 |      |      |      |      |
| 1981–2010           | 30.1  | 23.1 | 30.7 | 29.8 | 62.3 | 72.9  | 81.2  | 70.6 | 56.2 | 51.2 | 46.1 | 42.6 |
| Air temperature, °C |       |      |      |      |      |       |       |      |      |      |      |      |
| 2014                |       |      |      | 9.5  | 13.3 | 14.8  | 21.0  | 17.9 | 14.5 | 9.5  | 4.4  | −0.6 |
| 2015                | 0.6   | 0.3  | 4.6  | 7.2  | 12.1 | 15.7  | 18.0  | 21.3 | 14.2 | 6.6  | 5.1  | 3.8  |
| 2016                | −3.8  | 2.7  | 3.6  | 8.8  | 14.9 | 18.0  | 18.5  | 17.6 | 14.7 | 6.9  | 2.5  | 1.0  |
| 2017                | −3.2  | −1.2 | 5.1  | 6.7  | 13.1 | 16.7  | 17.3  | 18.7 |      |      |      |      |
| 1981–2010           | −2.4  | −1.6 | 1.8  | 7.7  | 13.2 | 15.8  | 18.3  | 17.7 | 13.0 | 8.1  | 2.8  | −1.0 |

**Table S5.** Wheat yields (t ha<sup>-1</sup>) under the influence of P treatments in the experiments.

| Experiment I <sup>1</sup> |                    | Experiment II <sup>2</sup> |                    | Experiment III <sup>2</sup> |                    | Experiment IV <sup>2</sup> |                   | Experiment <sup>2</sup>    |                    |                    |                    |
|---------------------------|--------------------|----------------------------|--------------------|-----------------------------|--------------------|----------------------------|-------------------|----------------------------|--------------------|--------------------|--------------------|
| Treatments                | Yield              | Treatments                 | Yield              | Treatments                  | Yield              | Treatments                 | Yield             | Treatments                 | V                  | VI                 | VII                |
| No P                      | 4.18 <sup>b</sup>  | No P                       | 4.85 <sup>d</sup>  | No P                        | 7.07 <sup>c</sup>  | No P                       | 8.27 <sup>b</sup> | No P                       | 6.02 <sup>c</sup>  | 6.51 <sup>c</sup>  | 4.36 <sup>c</sup>  |
| SP                        | 5.40 <sup>a</sup>  | SP-1                       | 5.42 <sup>bc</sup> | SP-1                        | 7.94 <sup>b</sup>  | SP-1                       | 9.23 <sup>a</sup> | SP-1                       | 6.40 <sup>ab</sup> | 7.42 <sup>b</sup>  | 5.45 <sup>ab</sup> |
| PR                        | 4.77 <sup>ab</sup> | SP-2                       | 5.60 <sup>ab</sup> | SP-2                        | 8.19 <sup>ab</sup> | SP-2                       | 9.53 <sup>a</sup> | SP-2                       | 6.53 <sup>ab</sup> | 8.08 <sup>a</sup>  | 5.71 <sup>a</sup>  |
| A+H <sub>2</sub> O        | 5.00 <sup>a</sup>  | SP-3                       | 5.83 <sup>a</sup>  | SP-3                        | 8.60 <sup>a</sup>  | SP-3                       | 9.45 <sup>a</sup> | SP-3                       | 6.70 <sup>a</sup>  | 7.72 <sup>ab</sup> | 5.38 <sup>ab</sup> |
| <i>AsBm</i>               | 5.26 <sup>a</sup>  | PR-1                       | 5.43 <sup>bc</sup> | <i>AgAf</i> -1              | 7.93 <sup>b</sup>  | <i>AB<sub>g</sub></i> -1   | 9.32 <sup>a</sup> | <i>AH<sub>g</sub></i> -1   | 6.32 <sup>b</sup>  | 7.36 <sup>b</sup>  | 5.10 <sup>b</sup>  |
| <i>BsBm</i>               | 4.89 <sup>ab</sup> | PR-2                       | 5.49 <sup>bc</sup> | <i>AgAf</i> -2              | 8.41 <sup>a</sup>  | <i>AB<sub>g</sub></i> -2   | 9.52 <sup>a</sup> | <i>AH<sub>g</sub></i> -2   | 6.40 <sup>ab</sup> | 7.47 <sup>b</sup>  | 5.13 <sup>b</sup>  |
|                           |                    | PR-3                       | 5.52 <sup>bc</sup> | <i>AgAf</i> -3              | 8.29 <sup>ab</sup> | <i>AB<sub>g</sub></i> -3   | 9.29 <sup>a</sup> | <i>AH<sub>g</sub></i> -3   | 6.39 <sup>ab</sup> | 7.66 <sup>ab</sup> | 5.23 <sup>ab</sup> |
|                           |                    | <i>AsBm</i> -1             | 5.25 <sup>c</sup>  | <i>AB<sub>g</sub>Ag</i> -1  | 7.96 <sup>b</sup>  | <i>AB<sub>g</sub>Bm</i> -1 | 9.47 <sup>a</sup> | <i>AH<sub>g</sub>Bm</i> -1 | 6.38 <sup>ab</sup> | 7.75 <sup>ab</sup> | 5.28 <sup>ab</sup> |
|                           |                    | <i>AsBm</i> -2             | 5.50 <sup>bc</sup> | <i>AB<sub>g</sub>Ag</i> -2  | 8.50 <sup>a</sup>  | <i>AB<sub>g</sub>Bm</i> -2 | 9.78 <sup>a</sup> | <i>AH<sub>g</sub>Bm</i> -2 | 6.48 <sup>ab</sup> | 8.00 <sup>a</sup>  | 5.45 <sup>ab</sup> |
|                           |                    | <i>AsBm</i> -3             | 5.29 <sup>c</sup>  | <i>AB<sub>g</sub>Ag</i> -3  | 8.46 <sup>a</sup>  | <i>AB<sub>g</sub>Bm</i> -3 | 9.56 <sup>a</sup> | <i>AH<sub>g</sub>Bm</i> -3 | 6.59 <sup>ab</sup> | 8.03 <sup>a</sup>  | 5.63 <sup>ab</sup> |

<sup>1</sup> fertilizers applied at P dose of 21 kg ha<sup>-1</sup>; <sup>2</sup> fertilizers applied at P doses of 17.6 (1), 26.4 (2) and 35.2 (3) kg ha<sup>-1</sup>; a-d - different letters within columns indicate significant differences at  $p \leq 0.05$ .

**Table S6.** Reference values for potentially toxic elements (mg kg<sup>-1</sup>) in plants, according to various sources.

| Content                                        | As                           | Al     | Cd                                                                  | Cr        | Cu     | Fe      | Ni      | Pb      | Zn      |
|------------------------------------------------|------------------------------|--------|---------------------------------------------------------------------|-----------|--------|---------|---------|---------|---------|
| Sufficient or normal [1]                       | 1-1.7                        | X0-X00 | 0.05-0.2                                                            | 0.1-0.5   | 5-30   | 10-1000 | 0.1-5   | 5-10    | 27-150  |
| Excessive or toxic [1]                         | 5-20                         | NPD    | 5-30                                                                | 5-30      | 20-100 | NPD     | 10-100  | 30-300  | 100-400 |
| Average in cereal grain [2]                    | 0.03-0.6                     | 10-140 | 0.03-0.5                                                            | 0.003-0.4 | 2.6-6  | 31-98   | 0.1-0.5 | 0.2-0.5 | 15-60   |
| Permissible in Poland                          |                              |        |                                                                     |           |        |         |         |         |         |
| – in cereal grain [3] <sup>1</sup>             | 0.20                         | n.s.   | 0.10 (0.20 <sup>4</sup> )                                           | n.s.      | n.s.   | n.s.    | n.s.    | 0.20    | n.s.    |
| – in feed materials of plant origin [4,5]      | 2                            | n.s.   | 1                                                                   | n.s.      | n.s.   | n.s.    | n.s.    | 10      | n.s.    |
| Other standards for food grain                 |                              |        |                                                                     |           |        |         |         |         |         |
| – FAO/WHO [6]                                  | 0.35 (0.2 <sup>2</sup> )     | n.s.   | 0.1 (0.2 <sup>4</sup> ; 0.4 <sup>5</sup> )                          | n.s.      | n.s.   | n.s.    | n.s.    | 0.2     | n.s.    |
| – EU [7]                                       | 0.1-0.25 <sup>3</sup>        | n.s.   | 0.1<br>(0.05 <sup>6</sup> ; 0.15 <sup>7</sup> ; 0.18 <sup>8</sup> ) | n.s.      | n.s.   | n.s.    | n.s.    | 0.2     | n.s.    |
| – PR of China [8]                              | 0.5 (0.2-0.35 <sup>3</sup> ) | n.s.   | 0.1 (0.2 <sup>5</sup> )                                             | 1.0       | n.s.   | n.s.    | n.s.    | 0.2     | n.s.    |
| Suggested maximum values in plant material [9] |                              |        |                                                                     |           |        |         |         |         |         |
| – for food purposes                            | n.i.                         | n.i.   | 0.15                                                                | n.i.      | 20     | n.i.    | 10      | 1       | 50      |
| – for feed purposes                            | n.i.                         | n.i.   | 0.5                                                                 | n.i.      | 25-50  | n.i.    | 50      | 10      | 100     |

<sup>1</sup> regulation repealed, no new; <sup>2</sup> for inorganic As in rice husked or polished (value in brackets); <sup>3</sup> for inorganic As in rice depending on its preparation and intended use; <sup>4</sup> for wheat; <sup>5</sup> for rice; <sup>6</sup> for barley and rye; <sup>7</sup> for rice and quinoa; <sup>8</sup> for durum wheat; n.s. – not standardized; n.i. – no information, NPD - not precisely defined.

## References

1. Kabata-Pendias, A. *Trace elements in soils and plants: Fourth edition*; CRC Press: 2010; pp. 1-520.
2. Kabata-Pendias, A.; Pendias, H. *Biogeochemistry of trace elements*; Warsaw, 1999; pp. 1-400.
3. MH-PL. Ordinance by the Minister of Health (Poland) of 13 January 2003 on maximum concentrations of chemical and biological impurities which may be present in food, food ingredients, permitted supplementary substances and substances helpful in food processing. *J. Laws* **2003**, 37, 326.
4. MARD-PL. Ordinance by the Minister of Agriculture and Rural Development (Poland) of 25 August 2014 amending the ordinance on the content of undesirable substances in animal feed. *J. Laws* **2014**, 37, 1213.
5. MARD-PL. Ordinance by the Minister of Agriculture and Rural Development (Poland) of 29 June 2019 amending the ordinance on the content of undesirable substances in animal feed. *J. Laws* **2018**, 2018, 1213.
6. FAO-WHO. *Codex Alimentarius. General Standard for Contaminants and Toxins in Food and Feed*. CXS 193-1995. Food and Agricultural Organization of the United Nation, World Health Organization: Rome, Italy, 2023.

7. EU. Commission Regulation (EU) 2023/915 of 25 April 2023 on maximum levels for certain contaminants in food and repealing Regulation (EC) No 1881/2006 (Text with EEA relevance). Off. J. Eur. Union **2023**, L119, 103-157.
8. USDA-FAS. *China Releases the Standard for Maximum Levels of Contaminants in Foods*. Foreign Agricultural Service, GAIN Report Number CH2023-0040. U.S. Department of Agriculture. **2023**.
9. Kabata-Pendias, A.; Motowicka-Terelak, T.; Piotrowska, M.; Terelak, H.; Witek, T. Ocena stopnia zanieczyszczenia gleb i roślin metalami ciężkimi i siarką. *Ramowe wytyczne dla rolnictwa. IUNG, Puławy* **1993**, 53, 1-20.
